# Supplementary material for: A cell-based fluorescent system and statistical framework to detect meiosis-like induction in plants
Source: Front Plant Sci. 2024 Jul 8;15:1386274. doi: 10.3389/fpls.2024.1386274 (PMC11260738; doi:10.3389/fpls.2024.1386274)
Supplement: Supplementary Table 1 — Fluorescent Arabidopsis lines screened. [file Table_1.xlsx]

## Sheet: Sheet1
	GENOTYPE	T2 RFP3-2	T2 RFP 3-1	T2 RFP2-2	T2 RFP 2-1	T2 RFP 1-12	T2 RFP 1-11	T2 RFP1-7	T2 RFP 1-4	T2 RFP 1-3	RFP cs67066	RFP cs67065	mCherry cs2106158	sGFP cs72272	mCherry cs2105619	RFP1-11	CS9561 ptGFP	RFP 1-3	GFP ATG8E	GFP 1-3	SEC-RFP	mCherry cs2105619	GFP-BASS	RFP cs67065	RFP cs67066	mCherry cs2106158	TGN-RFP	RFP 2-3 (single insertion) t3p1	RFP 2-3(single insertion) t3p5	RFP 3-1 (single insertion)T3P4
	QUALITY/ Expression	High(not single insertion)	High (not high confidence of single insertion)	medium/low(not single insertion)	very little to none(not single insertion)	very little(not high confidence of single insertion)	high(single insertion)	low(single insertion)	medium(not high confidence of single insertion)	low(single insertion)	Move forward	Do not move forward	Background on everything	Background on everything	Move Forward- Maybe after fixing	Move Forward-Good	Move Forward-Good	LOW	In root tip only	Move Forward-Good	Move Forward-Good	Move Forward	Move Forward- Good	Low (no discernible difference between wt)	Move Forward(moderate expression in the roots)			Move Forward
	Source	In-house	In-house	In-house	In-house	In-house	In-house	In-house	In-house	In-house	Public	Public	Public	Public	Public	In-house	Public	In-house	ISU(Bassham lab)	In-house	ISU (Bassham lab)	Public	ISU (Bassham lab)	Public	Public	Public	ISU (Bassham lab)	In-house	In-house	In-house
	If in-house or ISU single insertion?	Not single	Not single	Not single	Not single	Not single	Single	Single	Not single	Single	-	-	-	-	-	Single	-	Single	Single	Single	Assumed single		Assumed single	-	-	-	Assumed single	single	single	single
	Promoter	CaMV 35S	CaMV 35S	CaMV 35S	CaMV 35S	CaMV 35S	CaMV 35S	CaMV 35S	CaMV 35S	CaMV 35S	35S	UBQ1	UBQ10	CaMV 35s	UBQ10	CaMV 35S	CaMV 35S	CaMV 35S	CaMV 35S	CaMV 35S	CaMV 35s	UBQ10	CaMV 35s	UBQ1	35S	UBQ10	?	CaMV 35S	CaMV 35S	CaMV 35S
	means a qualitative approach was scored
