# Supplementary material for: A cell-based fluorescent system and statistical framework to detect meiosis-like induction in plants
Source: Front Plant Sci. 2024 Jul 8;15:1386274. doi: 10.3389/fpls.2024.1386274 (PMC11260738; doi:10.3389/fpls.2024.1386274)
Supplement: Supplementary Table 2 — Gates used for protoplast classification for RFP, GFP, both, and WT classifications. [file Table_2.xlsx]

## Sheet: Sheet1
				Gate name	Gate name	RFP Gates	GFP Gates	Both Gates	WT Gates
				FSC.H	Forward scatter height	>55,000	>55,000	>55,000	>55,000
				FSC.H	forward scatter area	<200,000	<200,000	<200,000	<200,000
				SSC.H	side scatter height	>450	>450	>450	>450
				SSC.H	side scatter height	<3,500	<3,500	<3,500	<3,500
					Excitation/emission
				BV605.A	407/602*	>800	>800	>800	>800
				BV510.A	405/510*	>800	>800	>800	>800
				FITC.A	494/520*	<560	>560	>560	<560
				FITC.A	494/520*	N/A	<10,000	<10,000	N/A
				PE.CF594.A	496,566/612*	>1,000	<1,000	>1,000	<1,000
				PE.CF594.A	496,566/612*	<10,000	N/A	<10,000	N/A
					*Source:https://www.bdbiosciences.com/content/dam/bdb/marketing-documents/Fluorochrome_Laser_Poster_2.pdf
